# Supplementary material for: Non-invasive molecular tracking method that measures ocular drug distribution in non-human primates
Source: Commun Biol. 2020 Jan 8;3:16. doi: 10.1038/s42003-019-0731-9 (PMC6949284; doi:10.1038/s42003-019-0731-9)
Supplement: Supplementary file 1 — Supplementary Information [file 42003_2019_731_MOESM1_ESM.pdf]

## Supplementary Figures

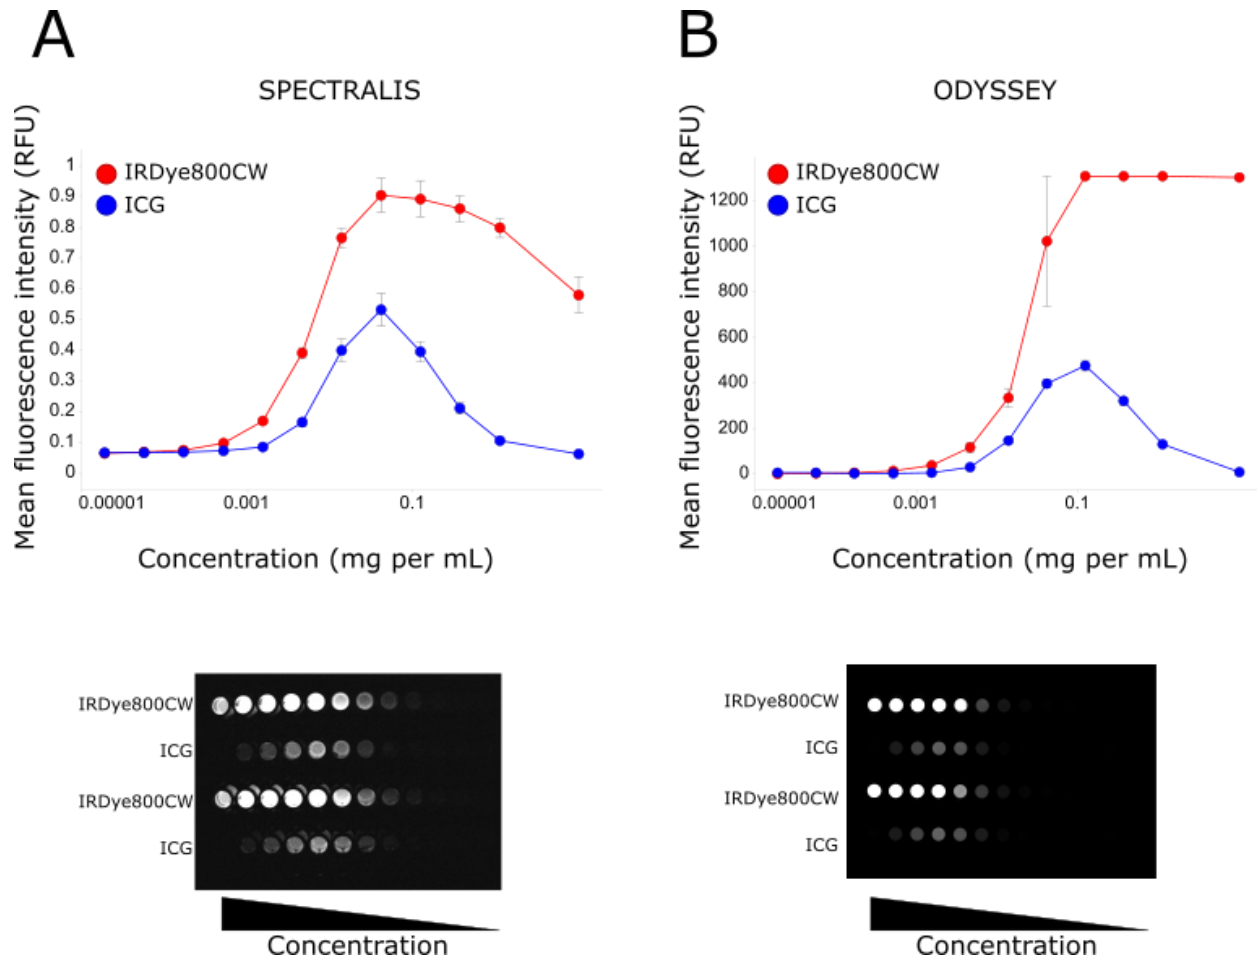

**Supplementary Figure 1. Comparison of IRDye800CW and ICG *in vitro*.** **A,B.** Concentration curves of ICG and IRDye800CW as measured with **A.** an indirect ophthalmoscope (Spectralis) at 80% sensitivity and **B.** a fluorescence scanner (Odyssey) at L2 intensity gain. Images below the graphs are representative images of each output. Error bars represent standard deviation of duplicate wells from two different plates.

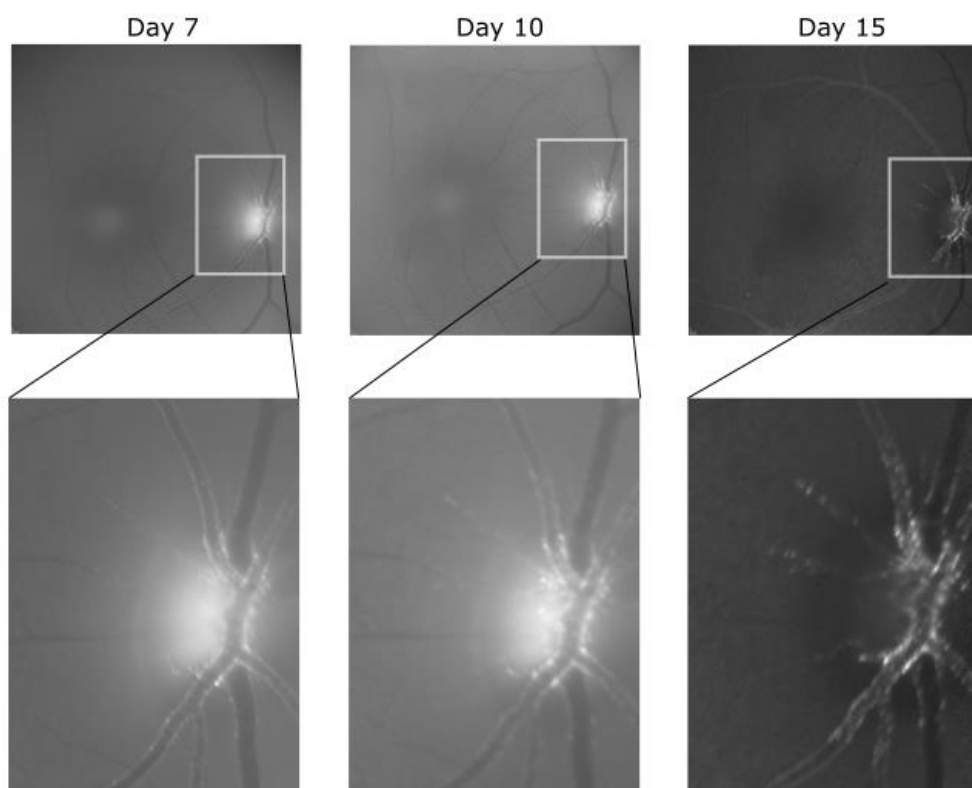

**Supplementary Figure 2. Localized accumulation of IVT-injected free IRDye800CW.** Examples of averaged images (ART set at 100) from free dye at Day 7, 10 and 14 using the 30° lens. Sensitivity was set differently to allow optimal signal to noise ratio. The images from the bottom row represent the magnified view of the white inserts from the top row.

A

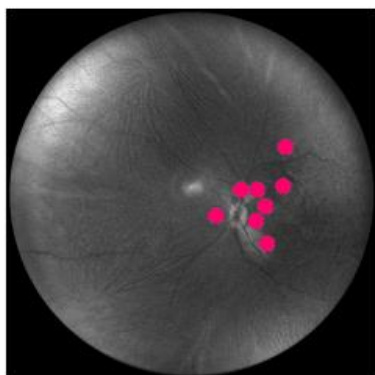

B

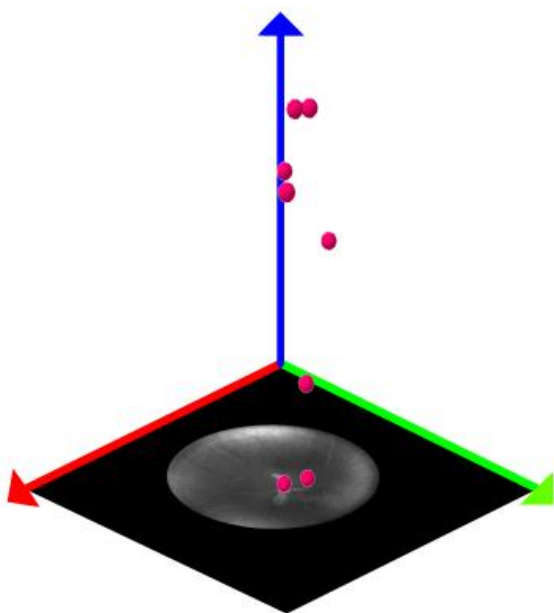

**Supplementary Figure 3. Evaluation of injection sites for IRDye800CW-labeled ranibizumab.** Red dots represent the locations of injection site based on the centroid of maximal pixel intensity area and were registered on a representative en-face IR image (**A**) and in 3D space reflecting the imaged vitreous (**B**).

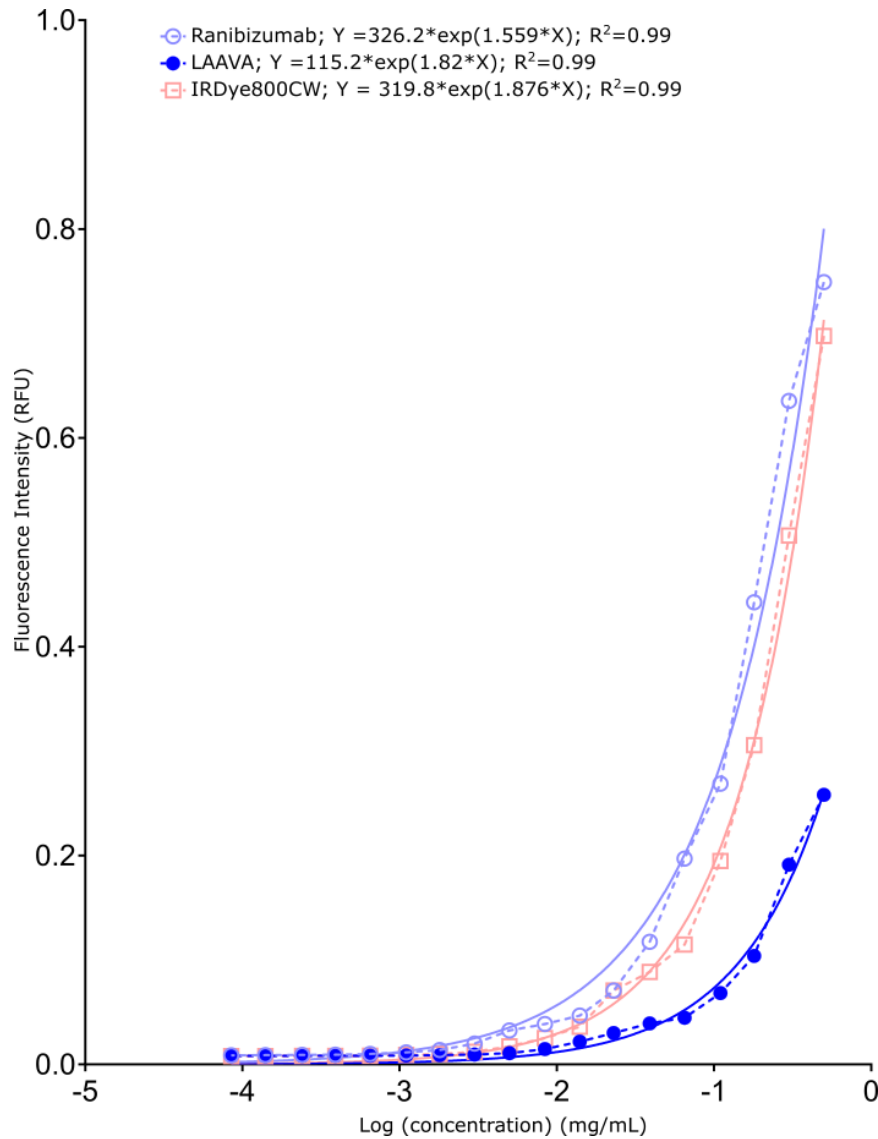

**Supplementary Figure 4. Calibration curves for free IRDye800CW, IRDye800CW-labeled ranibizumab and IRDye800RS-labeled LAAVA.** Different concentrations of the agents were imaged in the same conditions as *in vivo* imaging at 40% sensitivity in order to avoid saturation. Concentrations were log transformed and a non-linear fit was applied as best fit to generate the equation used to convert the fluorescence measured into concentration.
